# Supplementary material for: Synthesis of bimetallic aluminum–iron oxide nanorice, nanocubes and nanospheres
Source: Royal Society of Chemistry journal article supplement (doi:10.1039/d3nj02090h), 2023-01-01
Supplement: d3nj02090h1.pdf [file d3nj02090h1.pdf]

## Supporting Information

### Synthesis of Bimetallic Aluminum-Iron Oxide Nanorice, Nanocubes and Nanospheres

Abdul Hoque<sup>†</sup>, Artur Huseinov<sup>†</sup>, Chaminda P. Nawarathne<sup>†</sup>, and Noe T. Alvarez<sup>†\*</sup>

<sup>†</sup>Department of Chemistry, University of Cincinnati, Cincinnati, OH 45221, United States

\*E-mail: [alvarene@ucmail.uc.edu](mailto:alvarene@ucmail.uc.edu)

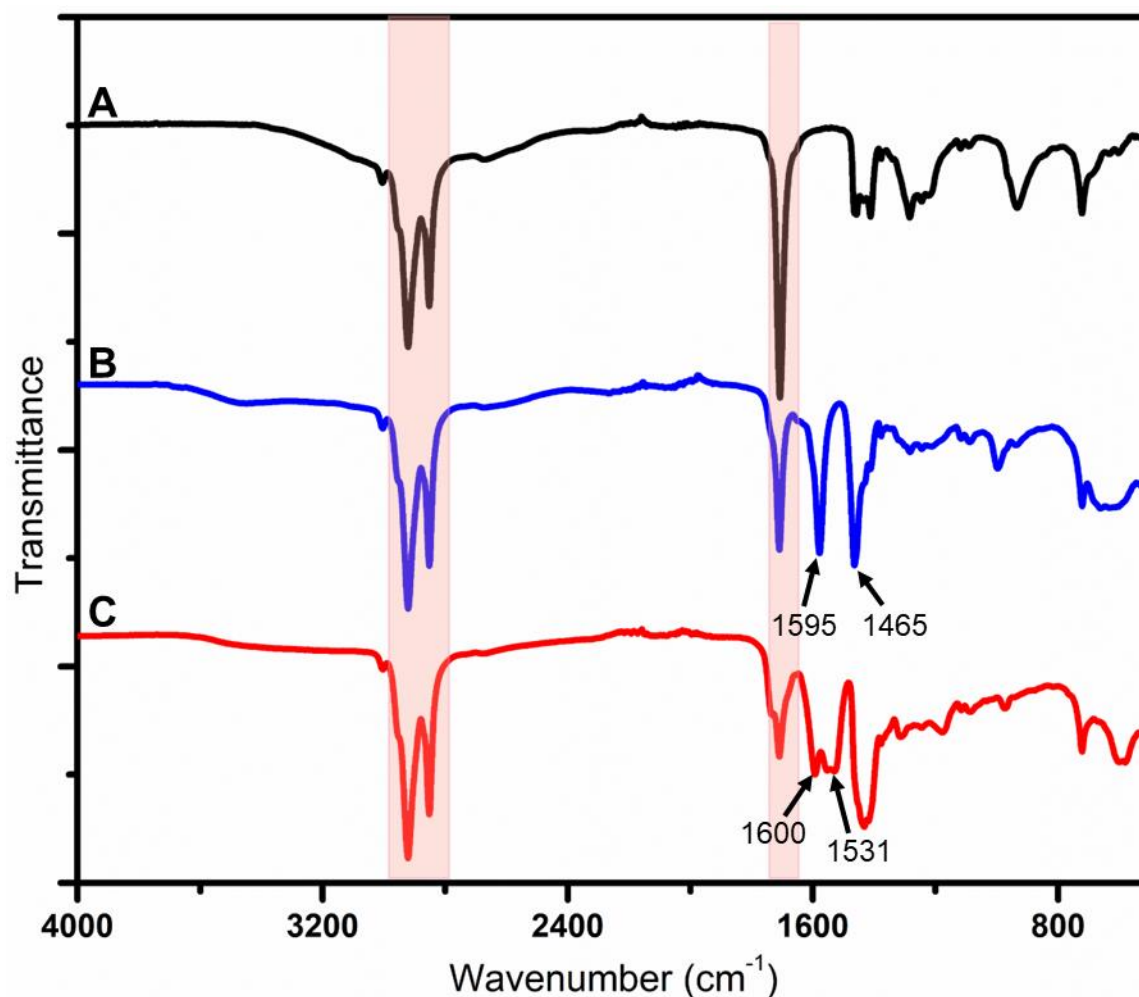

**Figure S1:** FTIR spectra of (A) pure oleic acid, (B) aluminum oleate and (C) iron oleate.

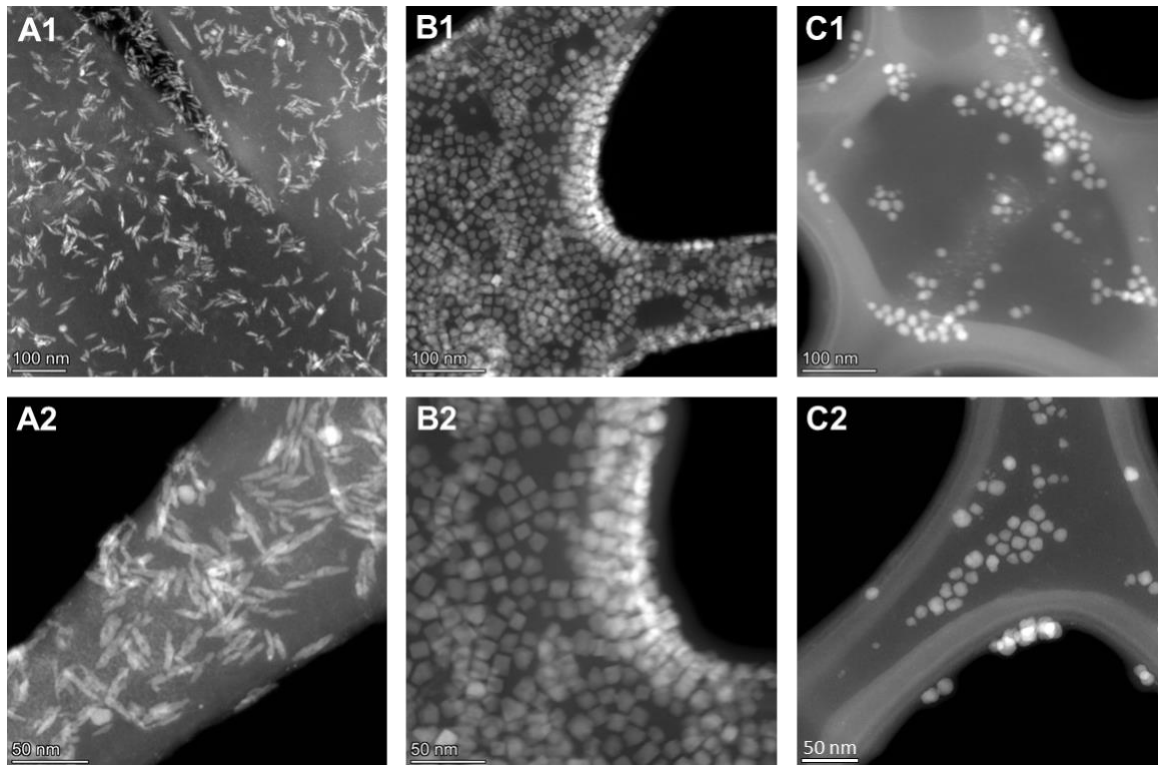

**Figure S2:** HAADF-STEM images of bimetallic  $\text{AlO}_x\text{-Fe}_2\text{O}_3$  nanoparticles with different shapes. Low magnification HAADF images of bimetallic: (A1) nanorice, (B1) nanocubes, and (C1) nanospheres. High magnification images of bimetallic  $\text{AlO}_x\text{-Fe}_2\text{O}_3$ : (A2) nanorice, (B2) nanocubes, and (C2) nanospheres.

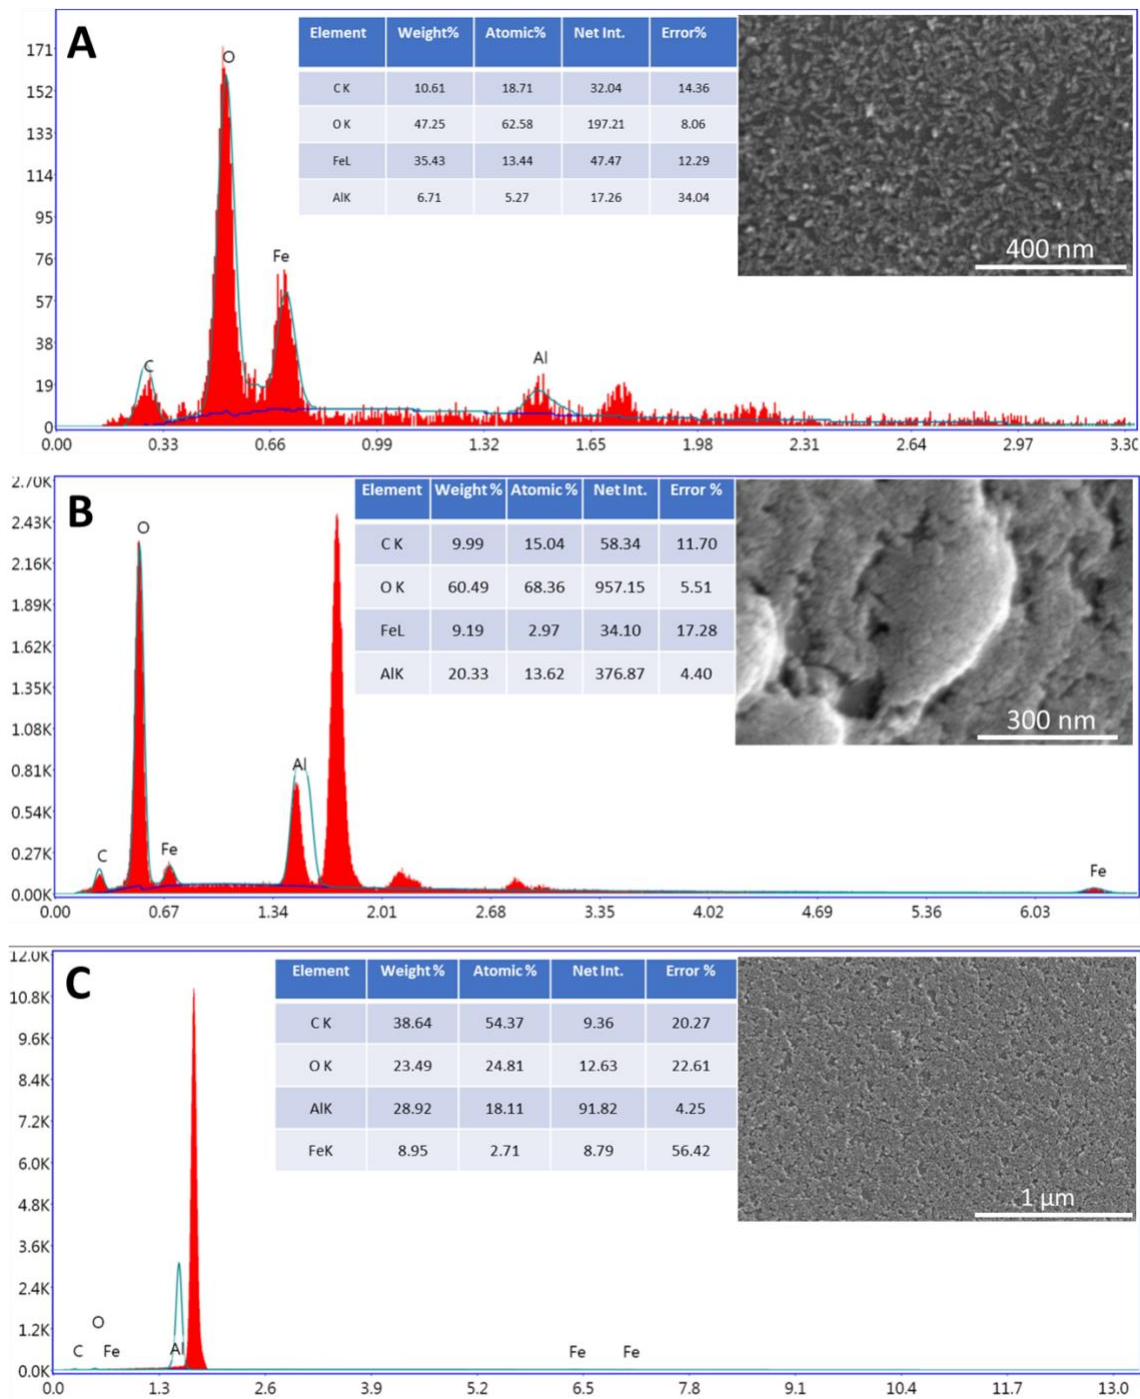

**Figure S3:** EDX analysis of as-synthesized bimetallic  $\text{AlO}_x\text{-Fe}_2\text{O}_3$  nanoparticles: (A) nanorice, (B) nanocubes, and (C) nanospheres.

**Table S1:** Atomic percent of different elements present in three different shapes of bimetallic  $\text{AlO}_x\text{-Fe}_2\text{O}_3$  nanoparticles synthesized from three different weight ratio of precursors mixture by XPS survey analysis.

| Precursor ratio<br>Fe-oleate: Al-oleate | Atomic % of<br>Fe | Atomic %<br>of Al | Atomic %<br>of O | Atomic %<br>of C |
|-----------------------------------------|-------------------|-------------------|------------------|------------------|
| (0.5 g + 1.5 g) 1:3                     | 4.95              | 12.18             | 36.03            | 43.93            |
| (1.0 g + 5.0 g) 1:5                     | 4.4               | 23.48             | 53.03            | 19.08            |
| (1.2 g + 12 g) 1:10                     | 3.27              | 26.27             | 53.01            | 11.73            |

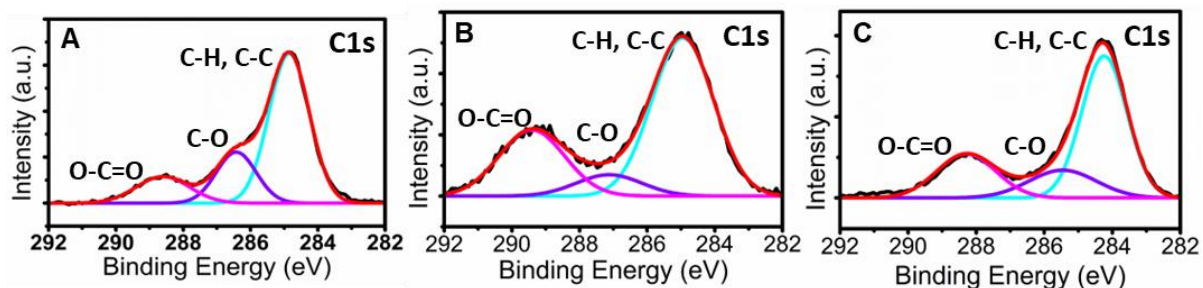

**Figure S4:** XPS core level spectra of C1s peaks from three different shapes bimetallic  $\text{AlO}_x\text{-Fe}_2\text{O}_3$  nanoparticles. (A) nanorice, (B) nanocubes, and (C) nanospheres.

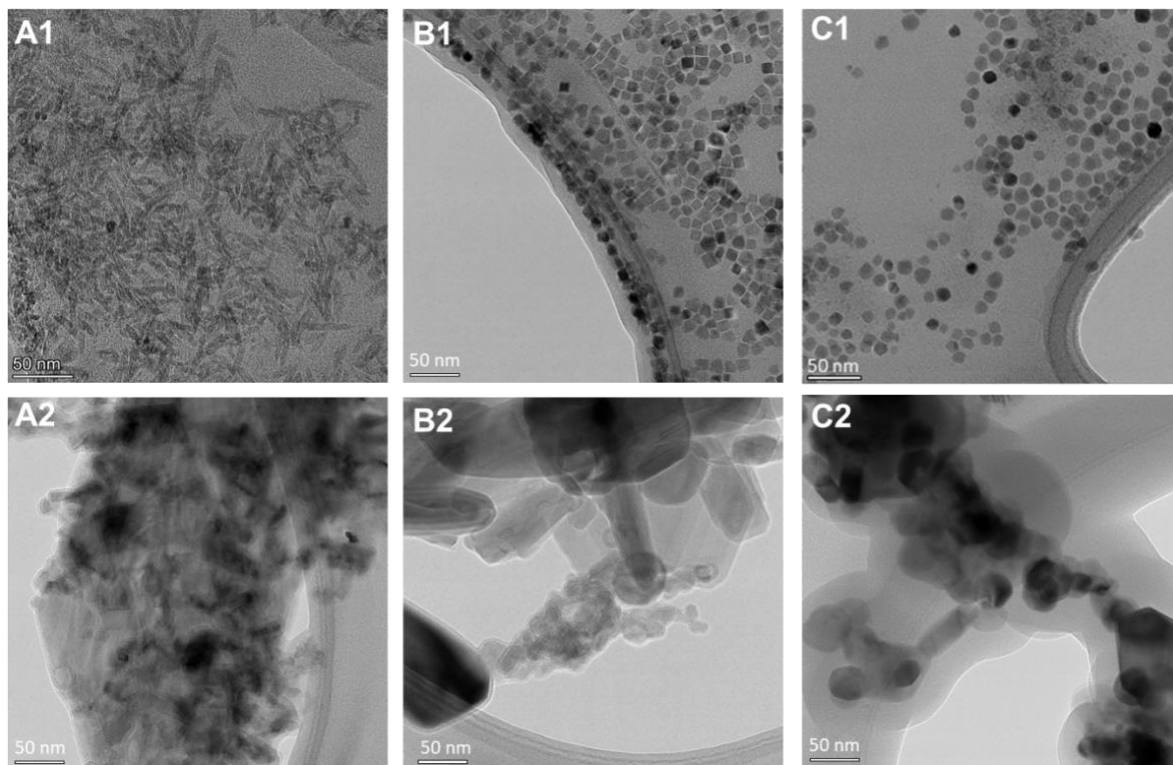

**Figure S5:** TEM images of bimetallic  $\text{AlO}_x\text{-Fe}_2\text{O}_3$  nanoparticles before and after annealing at 1100 °C for 4 h. (A1, A2) nanorice, (B1, B2) nanocubes, and (C1, C2) nanospheres.

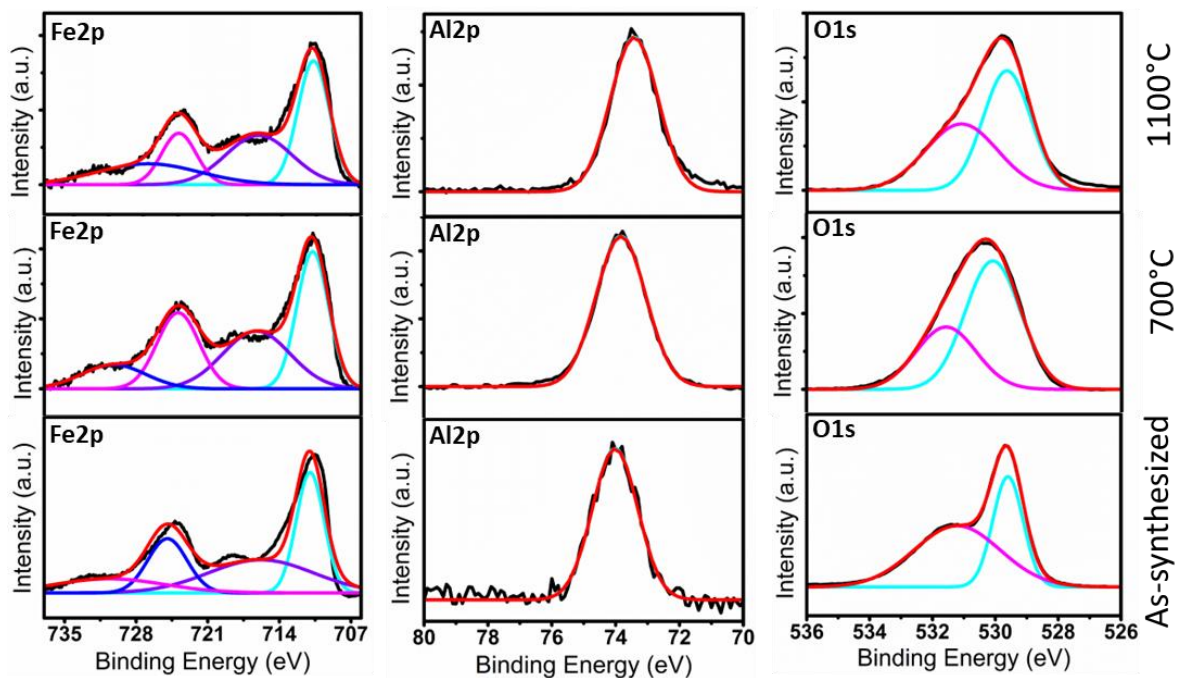

**Figure S6:** XPS core level spectra (Fe2p, Al2p, O1s) of bimetallic AlO<sub>x</sub>-Fe<sub>2</sub>O<sub>3</sub> nanorice particles, for the as-synthesized, annealing at 700 °C, and 1100 °C.

**Table S2:** XRD lattice parameters of  $\alpha$ -Fe<sub>2</sub>O<sub>3</sub> nanoparticles as specified in ICDD:00-001-1053.

| #  | Peak position<br>(2 $\theta$ ) | Interplanar distance d<br>( $\text{Å}^\circ$ ) | Intensity | Miller Indices<br>(hkl) |
|----|--------------------------------|------------------------------------------------|-----------|-------------------------|
| 1  | 24.16                          | 3.68                                           | 18        | 012                     |
| 2  | 33.28                          | 2.69                                           | 100       | 104                     |
| 3  | 35.74                          | 2.51                                           | 75        | 110                     |
| 4  | 40.99                          | 2.2                                            | 18        | 113                     |
| 5  | 49.5                           | 1.84                                           | 63        | 024                     |
| 6  | 54.23                          | 1.69                                           | 63        | 116                     |
| 7  | 57.56                          | 1.6                                            | 13        | 122                     |
| 8  | 62.26                          | 1.49                                           | 50        | 214                     |
| 9  | 64.18                          | 1.45                                           | 50        | 300                     |
| 10 | 69.58                          | 1.35                                           | 3         | 208                     |
| 11 | 72.03                          | 1.31                                           | 18        | 1010                    |
| 12 | 75.37                          | 1.26                                           | 13        | 217                     |
| 13 | 77.55                          | 1.23                                           | 3         | 306                     |

**Table S3:** XRD lattice parameters of as-synthesized AlO<sub>x</sub>-Fe<sub>2</sub>O<sub>3</sub> nanorice

| # | Peak position<br>(2 $\theta$ ) | Interplanar distance d<br>( $\text{Å}^\circ$ ) | Intensity | Miller Indices<br>(hkl)                           |
|---|--------------------------------|------------------------------------------------|-----------|---------------------------------------------------|
| 1 | 24.05                          | 3.70                                           | 25.89     | 012 ( $\alpha$ -Fe <sub>2</sub> O <sub>3</sub> )  |
| 2 | 33.1                           | 2.70                                           | 100       | 104 ( $\alpha$ -Fe <sub>2</sub> O <sub>3</sub> )  |
| 3 | 35.57                          | 2.52                                           | 85.82     | 110 ( $\alpha$ -Fe <sub>2</sub> O <sub>3</sub> )  |
| 4 | 40.73                          | 2.21                                           | 32.17     | 113 ( $\alpha$ -Fe <sub>2</sub> O <sub>3</sub> )  |
| 5 | 49.5                           | 1.84                                           | 53.58     | 024 ( $\alpha$ -Fe <sub>2</sub> O <sub>3</sub> )  |
| 6 | 54.06                          | 1.70                                           | 55.02     | 116 ( $\alpha$ -Fe <sub>2</sub> O <sub>3</sub> )  |
| 7 | 62.31                          | 1.49                                           | 41.18     | 214 ( $\alpha$ -Fe <sub>2</sub> O <sub>3</sub> )  |
| 8 | 63.94                          | 1.45                                           | 48.20     | 300 ( $\alpha$ -Fe <sub>2</sub> O <sub>3</sub> )  |
| 9 | 71.91                          | 1.31                                           | 24.99     | 1010 ( $\alpha$ -Fe <sub>2</sub> O <sub>3</sub> ) |

**Table S4:** XRD lattice parameters of as-synthesized AlO<sub>x</sub>-Fe<sub>2</sub>O<sub>3</sub> nanorice annealed at 700 °C

| #  | Peak position (2 $\theta$ ) | Inter planar distance d (Å) | Intensity | Miller indices (hkl)                             |
|----|-----------------------------|-----------------------------|-----------|--------------------------------------------------|
| 1  | 24.14                       | 3.68                        | 18.75     | 012 ( $\alpha$ -Fe <sub>2</sub> O <sub>3</sub> ) |
| 2  | 33.19                       | 2.69                        | 100       | 104 ( $\alpha$ -Fe <sub>2</sub> O <sub>3</sub> ) |
| 3  | 35.68                       | 2.51                        | 90.51     | 110 ( $\alpha$ -Fe <sub>2</sub> O <sub>3</sub> ) |
| 4  | 37.61                       | 2.39                        | 37.64     | 311 ( $\gamma$ -Al <sub>2</sub> O <sub>3</sub> ) |
| 5  | 40.9                        | 2.20                        | 37.32     | 113 ( $\alpha$ -Fe <sub>2</sub> O <sub>3</sub> ) |
| 6  | 45.85                       | 1.98                        | 34.94     | 400 ( $\gamma$ -Al <sub>2</sub> O <sub>3</sub> ) |
| 7  | 49.48                       | 1.84                        | 29.86     | 024 ( $\alpha$ -Fe <sub>2</sub> O <sub>3</sub> ) |
| 8  | 54.17                       | 1.69                        | 41.17     | 116 ( $\alpha$ -Fe <sub>2</sub> O <sub>3</sub> ) |
| 9  | 62.59                       | 1.48                        | 35.51     | 214 ( $\alpha$ -Fe <sub>2</sub> O <sub>3</sub> ) |
| 10 | 64.18                       | 1.45                        | 36.63     | 300 ( $\alpha$ -Fe <sub>2</sub> O <sub>3</sub> ) |
| 11 | 66.78                       | 1.40                        | 39.96     | 440 ( $\gamma$ -Al <sub>2</sub> O <sub>3</sub> ) |



**Table S5:** XRD lattice parameters of as-synthesized  $\text{AlO}_x\text{-Fe}_2\text{O}_3$  nanorice annealed at 1100 °C

| #  | Peak position<br>( $2\theta$ ) | Inter planar distance d<br>(Å) | Intensity | Miller indices<br>(hkl)                 |
|----|--------------------------------|--------------------------------|-----------|-----------------------------------------|
| 1  | 24.23                          | 3.67                           | 28.91     | 012 ( $\alpha\text{-Fe}_2\text{O}_3$ )  |
| 2  | 25.36                          | 3.51                           | 46.68     | 012 ( $\alpha\text{-Al}_2\text{O}_3$ )  |
| 3  | 33.24                          | 2.69                           | 100       | 104 ( $\alpha\text{-Fe}_2\text{O}_3$ )  |
| 4  | 34.95                          | 2.56                           | 96.93     | 104 ( $\alpha\text{-Al}_2\text{O}_3$ )  |
| 5  | 35.66                          | 2.52                           | 85.26     | 110 ( $\alpha\text{-Fe}_2\text{O}_3$ )  |
| 6  | 37.6                           | 2.39                           | 52.06     | 110 ( $\alpha\text{-Al}_2\text{O}_3$ )  |
| 7  | 40.99                          | 2.20                           | 28.43     | 113 ( $\alpha\text{-Fe}_2\text{O}_3$ )  |
| 8  | 43.15                          | 2.09                           | 89.83     | 113 ( $\alpha\text{-Al}_2\text{O}_3$ )  |
| 9  | 49.67                          | 1.83                           | 41.28     | 024 ( $\alpha\text{-Fe}_2\text{O}_3$ )  |
| 10 | 52.31                          | 1.75                           | 38.99     | 024 ( $\alpha\text{-Al}_2\text{O}_3$ )  |
| 11 | 54.32                          | 1.69                           | 46.41     | 116 ( $\alpha\text{-Fe}_2\text{O}_3$ )  |
| 12 | 57.27                          | 1.61                           | 73.69     | 116 ( $\alpha\text{-Al}_2\text{O}_3$ )  |
| 13 | 62.73                          | 1.48                           | 28.67     | 214 ( $\alpha\text{-Fe}_2\text{O}_3$ )  |
| 14 | 64.26                          | 1.45                           | 28.65     | 300 ( $\alpha\text{-Fe}_2\text{O}_3$ )  |
| 15 | 66.23                          | 1.41                           | 46.9      | 214 ( $\alpha\text{-Al}_2\text{O}_3$ )  |
| 16 | 76.74                          | 1.24                           | 13.97     | 1010 ( $\alpha\text{-Al}_2\text{O}_3$ ) |

**Table S6:** XRD lattice parameters of as-synthesized AlO<sub>x</sub>-Fe<sub>2</sub>O<sub>3</sub> nanocubes.

| # | Peak position (2 $\Theta$ ) | Interplanar distance d (Å°) | Intensity | Miller indices (hkl) |
|---|-----------------------------|-----------------------------|-----------|----------------------|
| 1 | 24.39                       | 3.65                        | 46.70     | 012                  |
| 2 | 33.36                       | 2.68                        | 100       | 104                  |
| 3 | 35.88                       | 2.50                        | 89.12     | 110                  |
| 4 | 41.01                       | 2.20                        | 40.29     | 113                  |
| 5 | 49.67                       | 1.83                        | 43.59     | 024                  |
| 6 | 54.26                       | 1.69                        | 49.92     | 116                  |
| 7 | 62.75                       | 1.48                        | 46.69     | 214                  |
| 8 | 64.28                       | 1.45                        | 56.48     | 300                  |
| 9 | 75.61                       | 1.26                        | 37.99     | 217                  |

**Table S7:** XRD lattice parameters of as-synthesized AlO<sub>x</sub>-Fe<sub>2</sub>O<sub>3</sub> nanospheres.

| #  | Peak position (2 $\Theta$ ) | Interplanar distance d (Å°) | Intensity | Miller indices (hkl) |
|----|-----------------------------|-----------------------------|-----------|----------------------|
| 1  | 24.39                       | 3.65                        | 44.78     | 012                  |
| 2  | 33.36                       | 2.68                        | 100       | 104                  |
| 3  | 35.88                       | 2.50                        | 88.65     | 110                  |
| 4  | 41.01                       | 2.20                        | 37.82     | 113                  |
| 5  | 49.67                       | 1.83                        | 40.33     | 024                  |
| 6  | 54.26                       | 1.69                        | 47.22     | 116                  |
| 7  | 62.75                       | 1.48                        | 46.21     | 214                  |
| 8  | 64.28                       | 1.45                        | 56.45     | 300                  |
| 9  | 72.16                       | 1.31                        | 25.26     | 1010                 |
| 10 | 75.61                       | 1.26                        | 37.73     | 217                  |

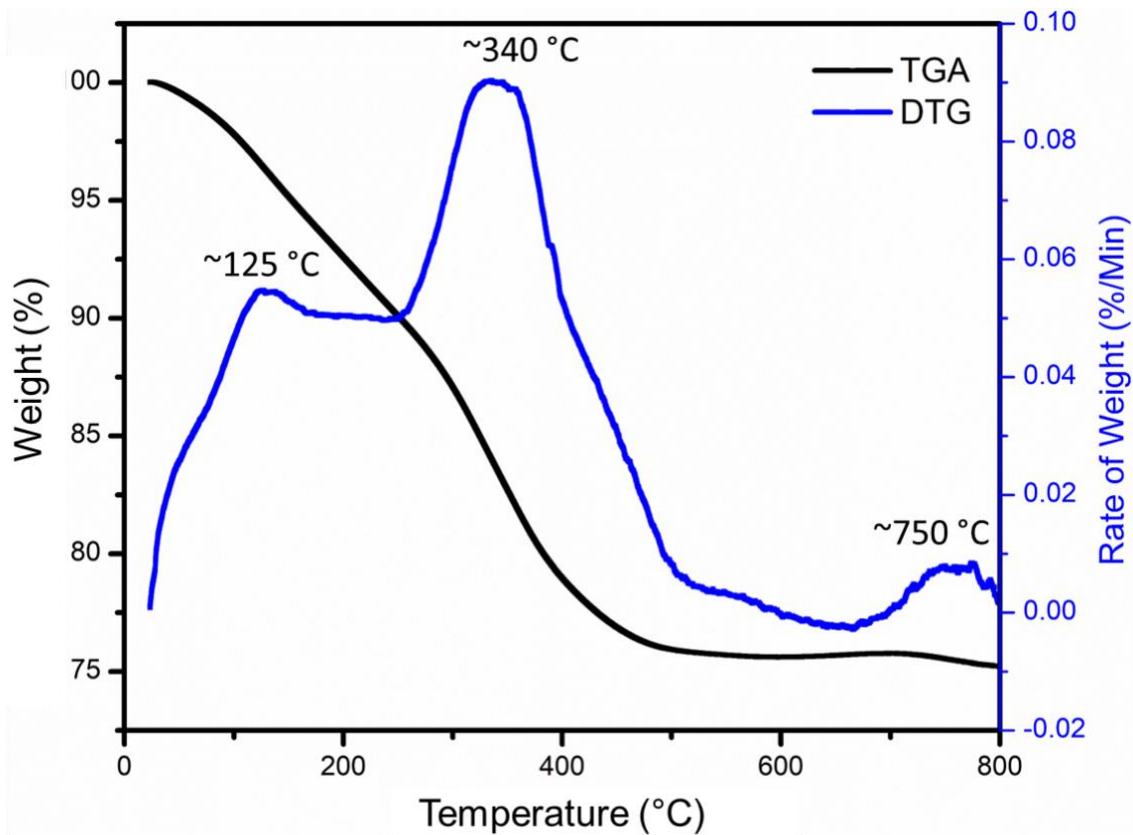

**Figure S7:** TGA and DTG graphs of bimetallic  $\text{AlO}_x\text{-Fe}_2\text{O}_3$  nanorice (1:3 ratio).

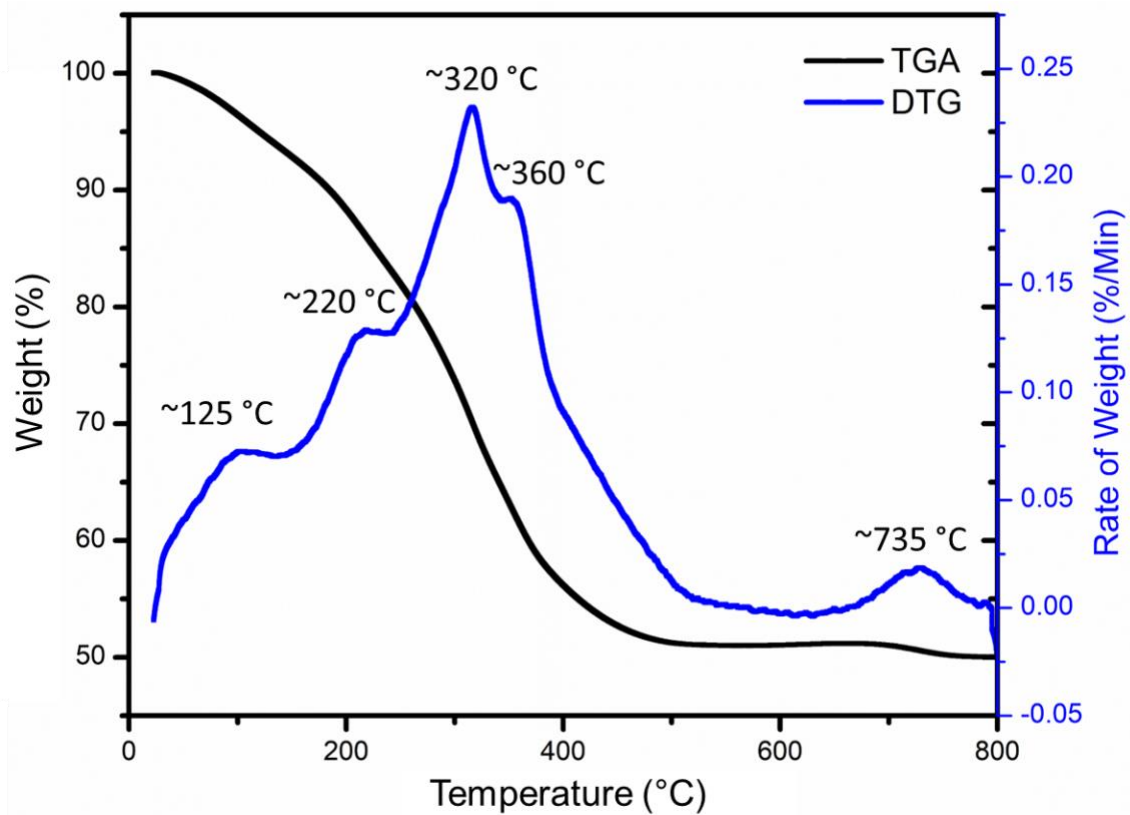

**Figure S8:** TGA and DTG graphs of bimetallic  $\text{AlO}_x\text{-Fe}_2\text{O}_3$  nanocubes (1:5 ratio).

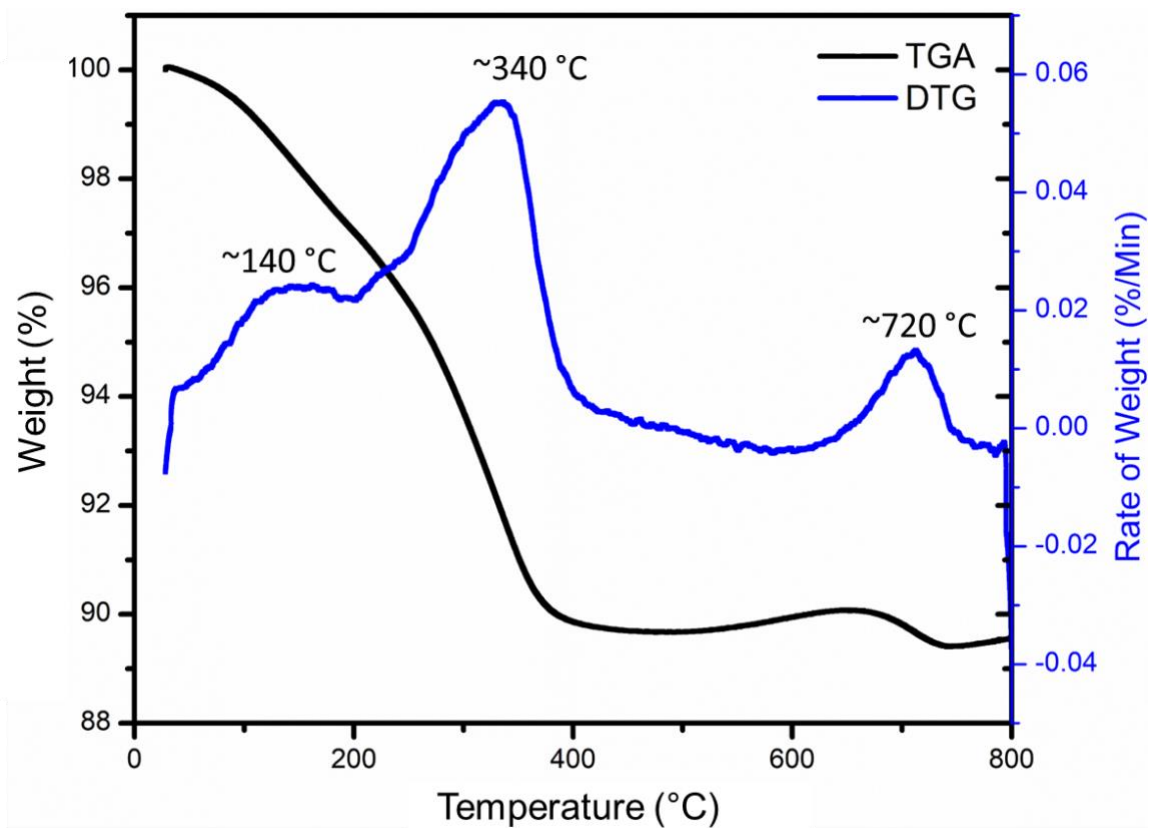

**Figure S9:** TGA and DTG graphs of bimetallic  $\text{AlO}_x\text{-Fe}_2\text{O}_3$  nanospheres (1:10 ratio).
